# Supplementary material
Source: MDPI journal article supplement (https://www.mdpi.com/2227-9040/11/1/36)
Supplement: s1 [file s1]

# Automated Multistep Lateral Flow Immunoassay Using a Smartphone for the Quantification of Foodborne Bacteria from Fresh Lettuce

Pattarapon Phangwipas <sup>1</sup>, Balamurugan Thangavel <sup>1</sup> and Joong Ho Shin <sup>1,2,\*</sup>

<sup>1</sup> Department of Biomedical Engineering, Pukyong National University, Busan 48513, Republic of Korea

<sup>2</sup> Industry 4.0 Convergence Bionics Engineering, Pukyong National University, Busan 48513, Republic of Korea

\* Correspondence: jhshin@pknu.ac.kr

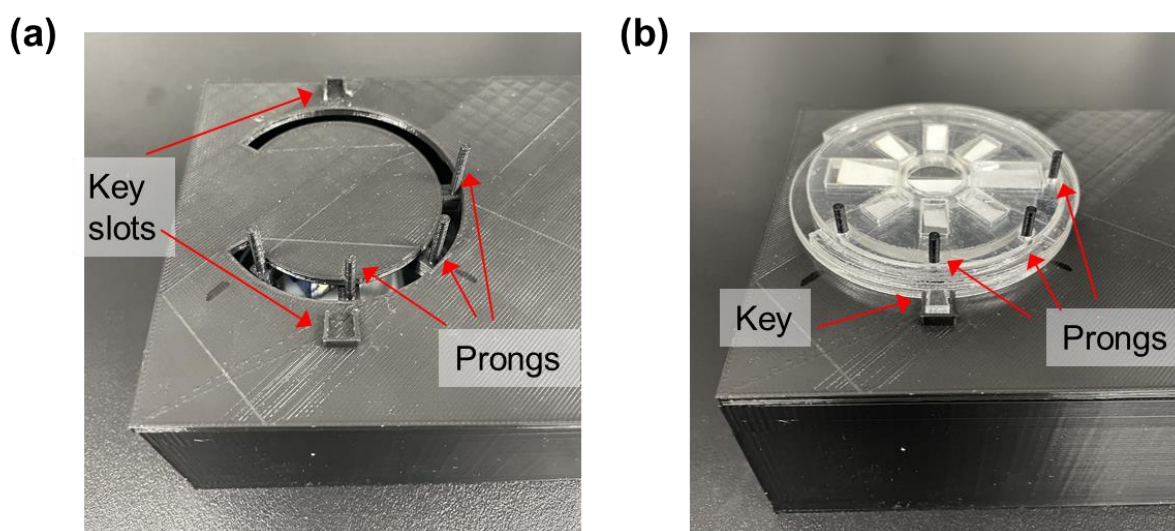

**Figure S1.** (a) Photo of the platform without the rotary device. Red arrows show the location of the key slots and prongs. (b) Photo of the platform with the rotary device. The key is placed into the key slot to fix the bottom piece and the prongs penetrate the four holes of the top piece so that the servo motor can rotate the top piece only.

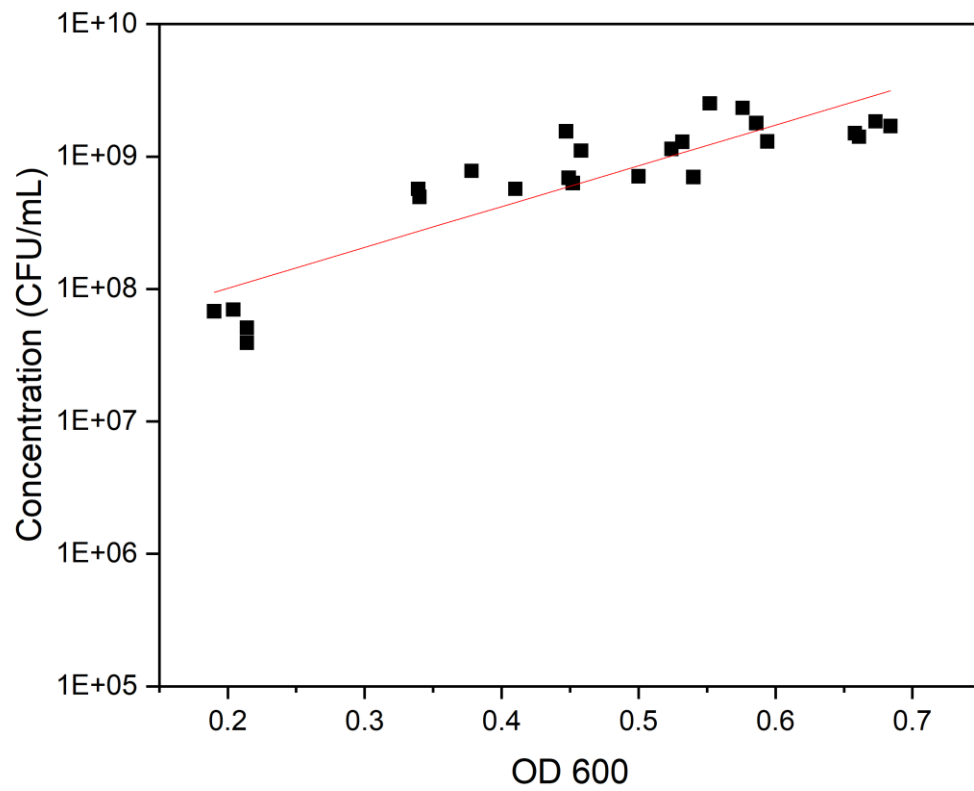

**Figure S2.** Graph showing the relationship between the concentration of bacteria with respect to optical density (at 600 nm).

**Table S1.** Inoculated bacteria on the agar plate for colony counting (only the plates showing 30-300 colonies are chosen for accurate enumeration), and detection signal on the LFA strips.

**Trial 1**

| Target<br>concentration<br>(CFU/mL)         | 0                                                                                   | 5.00E+04                                                                             | 5.00E+05                                                                              | 5.00E+06                                                                              |
|---------------------------------------------|-------------------------------------------------------------------------------------|--------------------------------------------------------------------------------------|---------------------------------------------------------------------------------------|---------------------------------------------------------------------------------------|
| Inoculated<br>bacteria on the<br>agar plate |    |    |    |    |
| Signal<br>generation from<br>the device     |  |  |  |  |

Trial 2

| Target<br>concentration<br>(CFU/mL)         | 0                                                                                   | 5.00E+04                                                                             | 5.00E+05                                                                              | 5.00E+06                                                                              |
|---------------------------------------------|-------------------------------------------------------------------------------------|--------------------------------------------------------------------------------------|---------------------------------------------------------------------------------------|---------------------------------------------------------------------------------------|
| Inoculated<br>bacteria on the<br>agar plate | 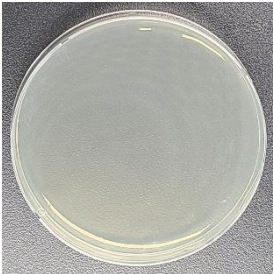   |    |    |    |
| Signal<br>generation from<br>the device     |  |  |  |  |

Trial 3

| Target<br>concentration<br>(CFU/mL)         | 0                                                                                   | 5.00E+04                                                                             | 5.00E+05                                                                              | 5.00E+06                                                                              |
|---------------------------------------------|-------------------------------------------------------------------------------------|--------------------------------------------------------------------------------------|---------------------------------------------------------------------------------------|---------------------------------------------------------------------------------------|
| Inoculated<br>bacteria on the<br>agar plate |    |    |    |    |
| Signal<br>generation from<br>the device     |  |  |  |  |
